1 **Title: Role of CYP3A5 in modulating androgen receptor signaling and its relevance to African American**  
2 **men with prostate cancer**

3 Priyatham Gorjala, Oscar B. Goodman Jr., Rick A. Kittles and Ranjana Mitra

4 **Authors:**

- 5 1- Priyatham Gorjala, PhD.  
6 Roseman University of health Sciences  
7 College of Medicine  
8 10530 Discovery Drive,  
9 Las Vegas, NV-89135  
10 pgorjala@roseman.edu  
11 2- Oscar B Goodman, MD. PhD.  
12 Roseman University of health Sciences  
13 College of Medicine  
14 10530 Discovery Drive,  
15 Las Vegas, NV-89135  
16 ogoodman@roseman.edu  
17 3- Rick A Kittles, PhD.  
18 City of Hope  
19 Beckman Research Institute  
20 Department of population Sciences  
21 Duarte, CA-91010  
22 rkittles@coh.org  
23 4- Ranjana Mitra, PhD. (communicating author)  
24 Roseman University of health Sciences  
25 College of Medicine  
26 10530 Discovery Drive,  
27 Las Vegas, NV-89135  
28 rmitra@roseman.edu  
29  
30  
31  
32  
33  
34  
35  
36  
37  
38  
39  
40  
41  
42  
43

1 **Abstract:**

2 **Background:** Androgen receptor signaling is crucial for prostate cancer growth and is regulated by intratumoral  
3 CYP3A5. As African American (AA) men often carry the wild type CYP3A5 and express high level of CYP3A5  
4 protein, we tested the effect of blocking the wild type CYP3A5 in prostate cancer cells from AA men on androgen  
5 receptor signaling. CYP3A5 processes several commonly prescribed drugs and many of these are CYP3A5  
6 inducers (e.g. phenytoin and rifampicin) or inhibitors (e.g. ritonavir and amiodarone). In this study, we test the  
7 effect of these commonly prescribed CYP3A5 inducers/inhibitors on AR signaling in prostate cancer cells.

8 **Methods:** Cell fractionation and immunofluorescence studies were performed to study AR nuclear localization  
9 and activation process using CYP3A5 siRNA and CYP3A5 inducers and inhibitors. A qPCR based array was  
10 employed to examine expression of AR downstream regulated genes after blocking CYP3A5 expression using  
11 a pool of CYP3A5 siRNA. Cell growth was monitored using MTS based assays. Since AAs tend to carry wild  
12 type CYP3A5 and non-Hispanic White Americans (NHWA) carry mutated CYP3A5 two cell lines one of AA origin  
13 (MDAPCA2b) carrying wt CYP3A5 and the other of NHWA origin (LNCaP) carrying mutant CYP3A5 were used  
14 for above experiments.

15 **Results:** Similar to that observed in LNCaP (mutant CYP3A5) earlier, CYP3A5 siRNA treated MDAPCA2b (AA,  
16 wild type CYP3A5) cells showed decreased AR nuclear translocation and PSA production. q-PCR based profiler  
17 assay identified several AR regulated genes which were downregulated with CYP3A5 siRNA pool treatment  
18 performed with cDNA from CYP3A5 siRNA pool and NT treated MDAPCA2b cells. These downregulated genes  
19 include SCL45A3, FKBP5, NCAPD3, MYC, MME, ELL2, PIK3R3, HPRT1 and SPDEF with p-value of  $\leq 0.005$ .  
20 These genes are known to regulate AR nuclear translocation, cell cycle progression and cell growth. SCL45A3,  
21 FKBP5, MYC, and ELL2 also showed decreased protein levels after CYP3A5 siRNA treatment.

22 Commonly prescribed drugs which are either CYP3A5 inhibitors (amiodarone, ritonavir) or inducers (phenytoin,  
23 rifampicin) were tested for their ability to alter AR signaling in both LNCaP and MDAPCa2b cells. The results  
24 show that the CYP3A5 inducers promoted AR nuclear translocation and downstream signaling whereas CYP3A5  
25 inhibitors abrogated them. The increased nuclear AR observed with phenytoin and rifampicin (CYP3A inducers)  
26 treatment is abrogated in CYP3A5 siRNA treated MDAPCa2b cells, confirming that the activation of AR activity

1 is specific to changes in CYP3A5 activity. Both the inducers tested demonstrated increased cell growth of  
2 prostate cancer cells, whereas the inhibitors showed reduced cell growth. The difference in growth is more  
3 pronounced in MDAPCa2b cells which carries a wild type CYP3A5 as compared to LNCaP with the exception of  
4 ritonavir which also downregulates total AR levels.

5 **Conclusions:** Concomitantly prescribed CYP3A5 modulating drugs may alter downstream AR signaling, cell  
6 growth and ADT efficacy in men, more so in AAs expressing wild type CYP3A5. Further, characterization and  
7 utilization of this observation how CYP3A5 inducers and inhibitors can alter AR signaling may provide guidance  
8 to physicians co-prescribing CYP3A5 modulating drugs to treat comorbidities in elderly patients undergoing ADT,  
9 particularly AA.

## 1 **Introduction:**

2 Androgen depletion therapy (ADT) is the standard treatment to manage castration-resistant prostate cancer  
3 (CRPC) [1]. Androgen receptor (AR) signaling changes; by gaining mutations and overexpressing to support  
4 growth, as the cancer becomes castration resistant. In all phases of prostate cancer AR remains active and is  
5 still expressed in patients undergoing ADT [2-4]. Mutated AR often can bypass the need for androgen activation,  
6 and can act as transcriptional activator in absence of androgens, promoting tumor growth [5]. Several new  
7 approaches are clinically available to block AR signaling one of them being blocking non-gonadal androgen  
8 synthesis [6]. Another useful approach is to disrupt tubulin dependent AR translocation to nucleus. Nonetheless,  
9 eventually the AR bypasses these strategies, leading to CRPC. It is highly therapeutically relevant to identify any  
10 additional mechanism to block AR nuclear translocation [7-9].

11 Our previous work shows that CYP3A5 has a critical role in AR signaling as it promotes AR nuclear translocation  
12 and downstream signaling promoting growth [10]. CYP3A5 is a cytochrome P450 enzyme primarily expressed  
13 in liver and small intestine. In liver, its main function is to process xenobiotics. CYP3A5 along with CYP3A4  
14 metabolizes 50% of the commonly prescribed drugs [11]; these drugs are inducers, inhibitors and substrates of  
15 CYP3A enzymes. Apart from liver and small intestine CYP3A5 is also expressed in prostate where its normal  
16 function is to convert testosterone to its lesser active derivative, 6 $\beta$ -hydroxytestosterone [12]. Prostate cancer  
17 patients are typically elderly as the average age at diagnosis is 66 [13] and often suffer from comorbidities.  
18 Medications prescribed for these comorbidities can be inducers, inhibitors or substrates of CYP3A5 and hence  
19 can modify intratumoral CYP3A5 activity and alter AR signaling and response to ADT. Prior reports strongly  
20 support our hypothesis that therapeutic management of cancers is compromised by drug-induced expression of  
21 members of the CYP3A subfamily [14]. CYP3A5 is the main isoform expressed in prostate where as CYP3A4 is  
22 the most common isoform expressed in liver. Although CYP3A4 and CYP3A5 share 80% similarity they are  
23 differentially regulated [14-16]. CYP3A5 expressed in prostate is also differently regulated compared to the one  
24 expressed in liver as it has a 5' UTR with androgen response elements (ARE).

25 Healthy prostate tissues are shown to express high basal levels of CYP3A5, but CYP3A5 expression in prostate  
26 cancer tissues is less well-characterized [17-19]. Different expression patterns in tumor cells may be due to  
27 polymorphic expression of CYP3A5. CYP3A5 has several variations most common being the CYP3A5\*3, that

1 carries a A>G mutation at position 6986 in the intron 3 (CYP3A5\*3, rs776746 A>G). The presence of CYP3A5\*3  
2 results in aberrant splicing producing truncated non-functional protein [20]. 90% of the Caucasians carry the \*3  
3 mutation (\*3/\*3) whereas African Americans mostly carry (72%) the wild type CYP3A5 (\*1/\*1 or \*1/\*3) expressing  
4 the full-length protein.

5 Previously we demonstrated that full length CYP3A5 facilitates nuclear translocation of androgen receptor in  
6 prostate cancer cells [10]. We have also demonstrated that CYP3A5 specific inhibitor, azamulin, and siRNA-  
7 based knock down of CYP3A5 expression reduced AR nuclear translocation. In the current study, we  
8 investigated the effect of commonly co-prescribed CYP3A5 inhibitors /inducers with androgen deprivation  
9 therapy, which can alter AR nuclear translocation and its downstream signaling affecting treatment response.  
10 This study can provide a prescription guideline to clinicians prescribing the CYP3A5 modulators with ADT. As  
11 African American mostly express the full length CYP3A5 that promotes androgen receptor signaling and  
12 promotes prostate cancer growth, this study is very relevant to the AA patients that often have aggressive  
13 disease and present health disparity.

## 15 **Materials and Methods:**

16 **Cell lines, Drugs and antibodies:** LNCaP, MDAPCa2b, 22RV1 and E066AAhT cells were purchased from  
17 ATCC and maintained in RPMI (Invitrogen, Carlsbad, CA), F-12K medium (ATCC® 30-2004), RPMI and DMEM  
18 (Invitrogen, Carlsbad, CA) media respectively. Supplements were added as recommended by ATCC. C4-2 was  
19 a gift from Dr. David Nanus and maintained in RPMI media. RC77 T/E (tumor) and RC77 N/E (normal) cell lines  
20 are a gift from Dr. John S Rhim and are maintained in Keratinocyte SFM media supplemented with epidermal  
21 growth factor and bovine pituitary extract [21].

22 Antibodies against Androgen receptor (ab74272), were obtained from Abcam, (Cambridge, MA). Anti-Flag  
23 (F1804) was from Millipore-Sigma (St. Louis, MO) and anti-GAPDH (10R-G109A) was from Fitzgerald Industries  
24 (Acton, MA). Anti- $\alpha$  tubulin (2125S) and anti Lamin A/C (4C11) were obtained from Cell signaling technologies  
25 (Danvers, MA). The secondary antibodies (IR dye 680 and IR dye 800) were from LI-COR (Lincoln, NE).

26 CYP3A inducers phenytoin (PHR1139), rifampicin (R3501), and inhibitors ritonavir (SML0491), amiodarone  
27 hydrochloride (A8423), azamulin (SML0485) were purchased from sigma-aldrich (St. Louis, MO).

1 The siRNA transfection reagents, oligofectamine and OPTIMEM were from Invitrogen; the siRNAs were from  
2 Dharmacon (Thermo scientific). MTS cell titer reagent was from Promega (Madison,WI).

3 **Western blotting:** Cells were washed in phosphate buffer (PBS) and lysed in RIPA buffer (50 mM TIRS, 150  
4 mM NaCl, 1% NP40, 0.5% sodium deoxycholate, 0.1% SDS, 2mM EDTA, 2mM EGTA) supplemented with  
5 protease and phosphatase inhibitors. GAPDH was used as an internal control for total protein, tubulin for  
6 cytoplasmic fraction and Lamin A/C for nuclear fraction. Infrared fluorescent-labeled secondary antibodies were  
7 used for detection using Odyssey CLx.

8 **Cell fractionation:** Nuclear and cytoplasmic cell fractionation was prepared using NE-PER Nuclear and  
9 cytoplasmic extraction kit from Thermo Scientific (Cat no.78833) and manufacturer's instructions were followed.  
10 The cells were treated with drugs in charcoal-stripped phenol red free media 48 hours after plating. Drugs and  
11 DHT were added at specified concentration and duration as indicated. Cells were washed in PBS once before  
12 cells were suspended in CER buffer. Protease, phosphatase inhibitors and EDTA was added prior to cell lysis.  
13 The pellet remaining after cytoplasmic isolation was washed twice with PBS. The pellet was suspended in NER  
14 buffer for nuclear fraction extraction according to guidelines, samples were stored at -80°C until further  
15 processing. Tubulin and Lamin were used as internal controls for cytoplasmic and nuclear fractions respectively.

16 **siRNA inhibition:** Cells were plated in complete media without antibiotics on poly D-lysine-coated plates (80,000  
17 cells per 6 well). After 48 hrs. of growth the cells were transfected using RNAimax according to the  
18 manufacturer's instructions. The smart pool non-target (NT) siRNA (Dharmacon catalog# D-001810-10) was  
19 used as a transfection control with the experimental target gene siRNAs. A pool of four siRNA (Dharmacon  
20 catalog# L-009684-01) against the CYP3A5 were used to block the expression. The final concentration of the  
21 siRNA (NT and targets) used was 30 nM.

22 **Confocal Microscopy:** Cells were seeded into 35 mm Glass bottom dish (Cellvis catalog# D35C4-20-1.5-N).  
23 The cells were fixed in 4% paraformaldehyde for 20 minutes and permeabilized using permeabilizing buffer  
24 (0.2% Tween 20 in PBS) for 5 minutes. Cells were blocked using 10% goat serum diluted in permeabilizing buffer  
25 with 1% BSA for 15 minutes. Primary antibodies were diluted at 1:100 in staining buffer (1% BSA in PBS) and  
26 incubated for 60 minutes at room temperature. Cells were washed three times (10 minutes each) in PBS.  
27 Secondary antibodies, Cy<sup>5</sup>-conjugated Donkey Anti-rabbit (711-175-152) and Alexa Fluor 488 - conjugated

1 Donkey Anti-Mouse (715-545-150) from Jackson immuno research, West Grove, PA were diluted at 1:50 in  
2 staining buffer and incubated for 30 minutes at room temperature. Cells were washed three times (10 minutes)  
3 in PBS and stained with 1  $\mu\text{g}/\text{mL}$  DAPI (4', 6-diamidino-2-phenylindole) in PBS for 5 minutes at room  
4 temperature. The cells were stored in PBS at 4°C until imaging is completed.

5 Cells were imaged using confocal laser scanning microscopy on a Nikon A1R using a galvano scanner and a  
6 60x Apo-TIRF oil immersion objective. To excite DAPI, FITC, TRITC and CY<sup>5</sup> 405 nm, 488 nm, 561 nm and 638  
7 nm solid-state lasers were used respectively. FITC and TRITC emissions were collected using GaAsP detectors  
8 on the A1R+ microscope. NIS Elements software from Nikon was used for recording the data.

9 **RT2 profiler:** RNA was isolated using RNeasy Mini kit (Cat no.74104) from Qiagen (Germantown, MD)  
10 manufacturer's instructions were followed. cDNA synthesis was performed using RT<sup>2</sup> first strand kit (Cat  
11 no.330404) Qiagen, according to manufacturer's instructions. The cDNA was diluted and used as template to  
12 analyze for gene expression pattern using RT<sup>2</sup> Profiler PCR Arrays (Cat no. 330231) specifically designed to  
13 probe panel of Human Androgen Receptor Signaling Targets (PAHS-142Z). The real-time PCR reaction data  
14 was collected using ABI 7500 fast real-time PCR system. A total of 96 genes were profiled, data analysis was  
15 done using Geneglobe portal on Qiagen website. Samples (triplicates) were grouped into control (Non-Target)  
16 and test (CYP3A5 siRNA) and normalized with Beta-2-microglobulin (B2M) and Ribosomal protein, large, P0  
17 (RPLP). A set of genes were identified based on fold change cutoff value of 2.0 and p value of 0.005.

18 **Luciferase assay:** Signal Lenti AR Reporter (luc) from Qiagen (product n0. 336851, Cat no. CLS-8019L) was  
19 used to generate AR pathway sensing LNCaP and MDAPCa2b cell lines for the study of the AR signal  
20 transduction pathway. These lentivirus particles have androgen response elements (ARE) fused to luciferase,  
21 which detects any changes in AR downstream signaling. Cells were transfected according to manufacturer  
22 instructions. Negative Control (only TATA box in place of ARE) transfected cell lines were also generated to  
23 measure background luciferase activity. Cells were maintained under puromycin selection pressure to select for  
24 stable chromosomal integration of the lentiviral constructs. The selected cells were tested for AR signaling  
25 pathway activation in response to DHT treatment after drug treatment using Brightglo luciferase assay from  
26 Promega (Cat no.E264A). The cells were collected into Eppendorf tube and divided into two equal aliquots. One

1 aliquot was used for luciferase assay and was lysed with Gloylisis buffer (Cat no. E266A) and the second aliquot  
2 was lysed with RIPA buffer for protein quantification.

3 **Genotyping Assay:** DNA was isolated from cell lines using QIAam DNA mini Kit (Cat no. 51304) from Qiagen  
4 according to manufacturer instructions. TaqMan™ Drug Metabolism Genotyping Assay (Cat no. 4362691) from  
5 Applied Biosystems with 7500 Fast System was used to determine CYP3A5 \*1 and \*3 allelic status.

## 7 **RESULTS:**

8  
9 **Differential expression of CYP3A5 between African American and Caucasian origin AR positive prostate**  
10 **cancer cell lines.** We have previously shown that CYP3A5 is expressed in androgen receptor positive prostate  
11 cancer cell lines (LNCaP, C4-2 and 22RV1) and promotes activation of AR and prostate cancer growth [10].  
12 CYP3A5 expression is polymorphic and is race linked so we genotyped the available AR positive cell lines from  
13 both African American (AA origin, MDAPCa2b, RC77 T/E (Tumor), RC77 N/E (normal) and Non-Hispanic White  
14 Americans (NHLA-LNCaP, C4-2, 22RV1, E006aahT) origin to determine their CYP3A5 polymorphism. (Table  
15 1). Genotyping revealed that all the NHLA lines carry the \*3/\*3 CYP3A5 variant in homozygous form. The three  
16 cell lines from AA origin, carry \*1/\*3 heterozygous wild type/mutant CYP3A5. E006aahT has been found to be  
17 not of African American origin [22] and carries \*3/\*3 homozygous mutation. We used LNCaP (\*3/\*3) and  
18 MDAPCa2b (\*1/\*3) cells for our current study as they are of NHLA and AA origin respectively, and are AR  
19 positive commercially available (ATCC) and show similar response to androgens.

20  
21 **CYP3A5siRNA downregulates AR nuclear translocation in MDAPCa2b cells expressing wild type**  
22 **CYP3A5 (\*1/\*3).** To test if wild type full length CYP3A5 regulates AR nuclear activation in a similar fashion we  
23 used MDAPCa2b cells, which express wild type CYP3A5 (\*1/\*3). MDAPCa2b cells were treated with NT and  
24 CYP3A5 siRNA pool to specifically block CYP3A5 and then induced with DHT in charcoal stripped phenol red  
25 free media to monitor AR nuclear translocation and activation. Cells were then stained with AR and Cy5 labelled  
26 secondary antibody. CYP3A5 siRNA treatment resulted in decreased nuclear translocation of AR (Fig. 1A). This  
27 observation was further confirmed with cell fractionation experiments performed after NT and CYP3A5 siRNA



1 treatment and DHT induction. Western blotting analysis was performed to monitor AR nuclear translocation in  
2 the cytoplasmic and nuclear fractions. The result confirms our previous observation with LNCaP cell line,  
3 CYP3A5 siRNA treated MDAPCA2b cells show decreased nuclear translocation of AR (Fig. 1C) after DHT  
4 induction as compared to non-target siRNA pool treated cells. In the NT siRNA treated group we observed  
5 significant cytoplasmic surge which was absent in the CYP3A5 siRNA treated cells. Of note CYP3A5 siRNA  
6 treatment did not affect total AR protein expression (Fig 1B).

7  
8 **CYP3A5 siRNA downregulates expression of AR regulated genes in MDAPCA2b cells.** To further evaluate  
9 the downstream signaling effect of CYP3A5 knockdown, cDNA prepared with RNA extracted from MDAPCA2b  
10 cells treated with NT and CYP3A5 siRNA pool was used for gene expression analysis. RT<sup>2</sup> PCR pathway array  
11 deciphering changes in signaling targets downstream of Androgen receptor shows down regulation of several  
12 genes listed in Table 2 with fold changes greater than 2.0 and p-values less than 0.005 depicted (Fig. 1D).  
13 Western analysis was performed to evaluate whether gene expression changes translated into changes in  
14 protein expression. FKBP5, c-Myc, ELK-1, prostatein protein expression also decreased in response to CYP3A5  
15 siRNA treatment (Fig. 1E1) consistent with mRNA downregulation (fold change 0.68, 0.55, 0.49 and 0.45  
16 respectively, P value  $\leq 0.05$ ). We did not observe changes in the levels of MME, SPDEF and KLK2 protein levels  
17 with CYP3A5 siRNA treatment (Fig. 1E2).

### 18 19 **Commonly co-prescribed CYP3A5 inducers /inhibitors can alter AR nuclear translocation.**

20 The average age at detection is 66 for prostate cancer patients; hence, they often have comorbidities, and are  
21 prescribed other medications to treat these co-morbidities while undergoing androgen deprivation treatment  
22 (ADT). CYP3A5 is known to process 33% of the commonly prescribed drugs and these co-prescribed drugs can  
23 be inducer/inhibitor of CYP3A5. Since AR is central to prostate cancer progression and is a main therapeutic  
24 target in treating prostate cancer any alteration in AR signaling can alter efficacy of these regimens. Based on  
25 our observation that CYP3A5 alters AR activity we wanted to test the effect of CYP3A5 inducers/inhibitors drugs  
26 on AR signaling as CYP3A5 can be modulated by these co-prescribed drugs. To evaluate the effect of known  
27 CYP3A inducers and inhibitors on AR nuclear translocation and downstream signaling we used two CYP3A

1 inhibitors, amiodarone (5  $\mu$ M) and ritonavir (35  $\mu$ M); and two inducers, phenytoin (50  $\mu$ M) and rifampicin (30  
2  $\mu$ g/mL) [23]. Amiodarone is often prescribed as an anti-arrhythmic drug whereas ritonavir is a component of  
3 highly active anti-retroviral therapy used in treating HIV patients. Phenytoin is one of the widely prescribed  
4 antiepileptic drugs and rifampicin is a known CYP3A5 inducer. CYP3A5 is not the main target of any of these  
5 drugs but its activity can be significantly modulated by these drugs. We tested their ability to affect AR activation  
6 process due to their ability to modulate CYP3A5 expression, which is separate from their primary target.  
7 Azamulin, a specific CYP3A inhibitor has been used as a control.

8  
9 We tested the effect of these CYP3A5 inhibitors and inducers on total AR expression. Total cell lysates prepared  
10 from LNCaP and MDAPca2b cells incubated with the selected drugs were analyzed by western blotting to verify  
11 if protein expression of AR is affected. None of the drugs tested affects total AR protein expression in LNCaP  
12 and MDAPCa2b cells except ritonavir (Fig. 2A).

13  
14 We observed reduced AR nuclear translocation in the cells treated with CYP3A inhibitors (amiodarone and  
15 ritonavir) and increased AR translocation in cells treated with CYP3A inducers (phenytoin and rifampicin) as  
16 compared to control cells that received no drugs (vehicle treated) (Fig. 2B) in both LNCaP and MDAPCa2b cell  
17 lines expressing different levels of CYP3A5 full length protein. Additionally, the cells treated with CYP3A inducers  
18 showed increase nuclear AR even without DHT induction compared to control. Similarly, the CYP3A5 inhibitor  
19 treated cells show lower nuclear AR also without DHT induction in both LNCaP (\*3/\*3) and MDAPCA2b (\*1/\*3)  
20 cells. We confirmed the CYP3A5 modulating effect of these drugs on AR activation by performing cell  
21 fractionation studies with and without DHT induction.

22  
23 Nuclear AR is decreased in LNCaP and MDAPCa2b cells treated with amiodarone compared to control cells that  
24 did not receive drug treatment (Fig. 2C1). Similarly, phenytoin increased nuclear AR after DHT induction (Fig  
25 2C2) in MDAPCa2b cells consistent with Immuno-florescence data. These observations indicate that changes  
26 in CYP3A5 levels in both LNCaP and MDAPCa2b cell lines can alter AR activation. Notably the small absolute

1 changes in CYP3A5 levels observed in LNCaP cells expressing very low level of full length CYP3A5 can alter  
2 AR signaling significantly.

3  
4 **Changes in AR activation by CYP3A inducers are due to their effect on CYP3A5 activity.** To test our  
5 hypothesis that modulation in AR activation is dependent on the changes in CYP3A5 expression caused by the  
6 CYP3A5 inducers/inhibitors we performed AR nuclear localization assays after CYP3A5 and NT siRNA  
7 treatment. The MDAPCa2b cells treated with CYP3A5 siRNA and CYP3A5 inducer (phenytoin and rifampicin)  
8 do not show increased nuclear AR in contrast to NT control (Fig. 2D). This result supports that the observed  
9 changes in AR nuclear fraction is dependent on the modulation of CYP3A5 by the above mentioned CYP3A5  
10 inducers (rifampicin and phenytoin) and is independent of their effect on main primary target.

11  
12 **CYP3A5 inhibitors and inducers alter PSA levels.** Prostate specific antigen (PSA) expression is regulated by  
13 androgen receptor and is an established marker to monitor AR downstream signaling. To evaluate downstream  
14 effects of AR nuclear translocation caused due to modulation of CYP3A5 we analyzed the level of PSA protein  
15 expression in the phenytoin, rifampicin and amiodarone treated cells. In both LNCaP and MDAPCa2b cell lines  
16 CYP3A inducing drugs phenytoin and rifampicin increased expression of PSA. The fold change in the  
17 MDAPCa2b cell line which carries a wild type CYP3A5 (Fig. 2E) was more as compared to LNCaP line carrying  
18 mutant CYP3A5 (\*3/\*3). As expected amiodarone reduced PSA protein expression in both the cell lines, the  
19 effect is more prominent after 48 hours of DHT treatment.

20  
21 **CYP3A5 modulating drugs affect AR downstream signaling.** We used a luciferase-based reporter assay to  
22 determine the effect of commonly prescribed CYP3A5 inhibitors/ inducers on their ability to modify AR  
23 downstream signaling. Both LNCaP and MDAPCa2b cell lines were transduced with a viral construct carrying  
24 androgen response elements (AREs) fused with luciferase, positive clones were selected after antibiotic  
25 selection. Negative controls were setup with constructs carrying only the TATA promoter without ARE. A pool of  
26 positive clones were used to monitor changes in luciferase activity after treatment with the CYP3A5  
27 inducers/inhibitors. The reporter assay using MDAPCA2b cells show increased luciferase activity with CYP3A5

1 inducers (phenytoin, rifampicin and hyperforin) and decreased luciferase activity with inhibitors (ritonavir,  
2 amiodarone and chloramphenicol) (less AR activation) (Fig 3A). LNCaP cells showed increased luciferase  
3 activity after treatment with CYP3A5 inducers phenytoin and rifampicin with DHT treatment, phenytoin shows an  
4 increase in AR activity even without DHT induction similar to earlier observation (Fig 3B). The inhibitors  
5 amiodarone and ritonavir show reduced luciferase units (AR activity) both with or without DHT induction (Fig 3B).

6  
7 **CYP3A can regulate PCa cell growth by modifying AR activation.** Androgen signaling pathway is involved  
8 in cell growth; based on our observation that CYP3A inhibitors and inducers alter AR nuclear translocation, we  
9 hypothesized that they should also alter cancer cell growth. To test our hypothesis, we monitored the effect of  
10 these inhibitors and inducers on prostate cancer cell growth. Both LNCaP and MDAPCa2b cell lines were  
11 incubated with different dose range of inducers [phenytoin (0-60  $\mu$ M), rifampicin (0-35  $\mu$ M)] and CYP3A inhibitors  
12 [amiodarone (0-6  $\mu$ M), ritonavir (0-40  $\mu$ M)]. Our results indicate that CYP3A inhibitors amiodarone and ritonavir  
13 decreased cell growth where as CYP3A inducers phenytoin and rifampicin reduce cell growth of both cell lines  
14 increasing concentrations (Fig 3C). The effect of CYP3A inducers and inhibitors are more pronounced in  
15 MDAPCa2b cells compared to LNCaP which may be due to the presence of wild type CYP3A5 (\*1/\*3) which has  
16 3-4 times more functional CYP3A5 as compared LNCaP (\*3/\*3).

## 18 DISCUSSION

19  
20 Our previous work shows that CYP3A5 inhibition can lead to growth inhibition in LNCaP cells due to blocking of  
21 AR activation and downstream signaling. In keeping with previously published results for LNCaP, the  
22 MDAPCa2b, which carries one copy of wild type CYP3A5 (\*1), also promotes AR nuclear localization.  
23 MDAPCa2b cells showed reduced AR nuclear localization after CYP3A5 siRNA (pool) treatment as compared  
24 to NT (pool). CYP3A5 is polymorphic with the wild type variant encoding full length translated protein being  
25 expressed in 73% of AAs, whereas only 5% of this variant is expressed in NHWA [20, 24]. Since \*3 is the most  
26 common difference between AA and NHWA we analyzed the available prostate cancer cell lines and used one  
27 (\*3/\*3, LNCaP) and the other (\*1/\*3, MDAPCa2b) cell line for this study. There are 12 known SNPs in the

1 CYP3A5 gene that mostly result in inactive protein. Distribution of these SNPs between races varies depending  
2 on the SNPs. The most commonly expressed mutation (\*3) is a point mutation at 6986A > G that results in  
3 alternative splicing of an insertion from intron 3 resulting in a nonsense-mutated nonfunctional truncated protein.  
4 Even though A>G mutation leads to truncated protein in \*3 mutation, 5% of the matured RNA can bypass the  
5 alternative splicing and express low levels of full length CYP3A5 protein as observed in LNCaP cells (\*3/\*3). The  
6 most common SNP (\*3) mutation is present in 95% of NHTWA, whereas 75% of AA carry wild type and 10-13%  
7 of AAs carry \*6 and \*7 mutations (truncated protein) [25, 26]. Prevalent expression of wild type CYP3A5 (\*1/\*1)  
8 form can promote AR activation in the AA prostate cancer patients as compared to NHTWA. Since CYP3A5 is the  
9 major extrahepatic CYP3A isoform expressed in prostate and regulates AR activation, the presence of these  
10 SNPs in CYP3A5 may alter prostate cancer occurrence growth and treatment resistance in a race dependent  
11 manner.

12  
13 Since MDAPCa2b carries a wt CYP3A5 we used this cell line for the PCR based pathway array to study the  
14 effect of CYP3A5 inhibition on AR downstream signaling. All the genes in this q-PCR base array carry androgen  
15 response elements and hence regulated by AR. The 11 genes which show maximum fold change ( $\geq 2.5$ ) with  
16 CYP3A5 siRNA treatment are known to play important role in prostate cancer growth and severity. Further  
17 investigation revealed that four (SLC45A3, FKBP5, c-MYC and ELL2) of those 11 genes show reduced protein  
18 expression whereas MME, SPDEF and KLK2 did not show fold changes in protein expression. SLC45A3 also  
19 known as prostein is down regulated (-4.56 fold) with CYP3A5 siRNA treatment and belongs to solute carrier  
20 family 45. Protein expression is seen in both normal and malignant prostate tissue, its messenger RNA and  
21 protein are upregulated in response to androgen treatment in prostate cancer cells. [27, 28]. FKBP5  
22 (downregulated, -4.43 fold, also called FKBP51) is a co-chaperone that belongs to a family of immunophilins,  
23 FK506 binding proteins (FKBPs). FKBP5 works with several different signaling pathways, including steroid  
24 receptor signaling, NF- $\kappa$ B, and AKT pathways, all of which contribute to tumorigenesis and drug resistance [29,  
25 30] and FKBP5 is a target for AR signaling [31]. A recent study uncovered a mechanism in which FKBP5 is found  
26 to form a complex with HSP90 and promote AR signaling in prostate cancer [32]. Members of this family are  
27 targets for drugs such as rapamycin and cyclosporine. FKBP5 is known to modulate steroid receptor (androgen,

1 progesterone, glucocorticoid) function by forming complex with HSP90 and HSP70. c-MYC also significantly  
2 downregulated with CYP3A5 siRNA treatment is one of the key genes amplified in prostate cancer progression.  
3 c-MYC induces AR gene transcription and is frequently upregulated in CRPC. A positive correlation between c-  
4 MYC and AR mRNA has been reported [33-37]. ELL2 (elongation factor, RNA polymerase II) is encoded by an  
5 androgen-response gene in the prostate [31, 38], it suppresses transient pausing of RNA polymerase II activity  
6 along the DNA strand and facilitates the transcription process [39]. ELL2 has been identified as an androgen  
7 response gene in immortalized normal human prostate epithelial cells as well as prostate cancer cell lines LNCaP  
8 and C4-2[31, 40]. ELL2 down regulation is seen in prostate cancer specimens and other observations indicate  
9 that its decrease improves cell proliferation, migration and invasion [41]. However, another study by Zang et. al.  
10 indicates that ELL2 has important role in DNA damage response and repair. This enables ELL2 loss to function  
11 like a double edge sword where on one hand can induce prostate carcinogenesis and on the other can sensitize  
12 cells to radiation therapy [42]. Human kallikrein-related peptidase 2 (KLK2, previously known as hK2) is a  
13 secreted serine protease from the same gene family as PSA. It shares 80% sequence homology with PSA and  
14 is responsible for cleavage of pre-PSA to active mature PSA [43]. Our studies only indicate fold change in mRNA  
15 levels but not protein levels after CYP3A5 siRNA treatment. Studies give contradictory evidence towards KLK2's  
16 use as marker for detection of prostate cancer in combination with PSA [44-46]. KLK2 has been found to  
17 modulate AR to increase cell growth after development of CRPC [47]. In conclusion, this data supports our earlier  
18 observation that CYP3A5 plays a major role in AR regulation thus modulating AR downstream signaling and  
19 prostate cancer growth. This also points how presence of a wild type CYP3A5 (preferentially present in AAs) can  
20 significantly alter AR signaling compared to cells carrying only inactive CYP3A5 polymorphic forms (expressed  
21 in NHWAs).

22 CYP3A5 is an enzyme whose activity can be physiologically altered by many drugs that are activators or  
23 inhibitors of CYP3A5. Men with prostate cancer undergoing ADT are often elderly and have comorbidities  
24 requiring concomitant prescription medications, many of which are CYP3A5 inducers or inhibitors. The  
25 modulation of CYP3A5 by concomitant drugs may enhance or interfere with ADT, of great relevance to the  
26 AAs expressing wild type CYP3A5. Our data show that commonly prescribed CYP3A5 inducers promote AR  
27 nuclear migration whereas CYP3A5 inhibitors block AR nuclear migration. In our current study, we have used

1 two CYP3A5 inhibitors (ritonavir and amiodarone) and two inducers (phenytoin and rifampicin) to test their effect  
2 on AR activation and downstream signaling in both LNCaP and MDAPCa2b cell lines. The results of the study  
3 indicate that the CYP3A5 inhibitors show less nuclear AR and less PSA expression similar to CYP3A5 siRNA.  
4 Whereas, the inducers on the other hand promoted nuclear AR translocation with and without DHT induction.  
5 Both the cell lines show similar effect since both the cell lines have different AR and CYP3A5 expression we  
6 were not able to derive a quantitative difference between both the cell lines. The reporter assay also showed  
7 similar response, which contains androgen response elements (AREs) to test the effect on AR downstream  
8 signaling. Although CYP3A5 is not the main target of any of these drugs it was shown that the specific effect on  
9 AR signaling is due to the changes in CYP3A5 and not due to the primary target of these drugs (Figure 2D). These  
10 drugs inhibit both CYP3A4 and CYP3A5 isoform. Since CYP3A5 is the major extrahepatic form expressed in  
11 prostate, the observed effect on AR signaling is due to the alteration in CYP3A5 and not CYP3A4.

12 Both the inducers increase the proliferation of the cells (LNCaP and MDAPCa2b) and the inhibitors reduce cell  
13 growth. Interestingly the effect of inducers and inhibitors on growth are more pronounced in MDAPCa2b which  
14 carries the wild type CYP3A5 as compared to LNCaP(\*3/\*3), with the exception of ritonavir. The observed  
15 difference can be because the other three tested inhibitors only effect the AR nuclear localization whereas  
16 ritonavir also affects total AR levels. Nonetheless, these data strongly suggest that concomitant CYP3A5 inhibitor  
17 / inducers taken while the patient is undergoing ADT may alter the efficacy of ADT. Although drug interactions  
18 monitor direct interactions between drugs the effect of concomitant CYP3A5 inducers and inhibitors have not  
19 been demonstrated previously. Based on our data we suggest that taking CYP3A5 inhibitors concomitantly may  
20 clinically benefit patients undergoing ADT (enhancing its effect), whereas taking CYP3A5 inducers may reduce  
21 the efficacy of the ADT treatment (countering its effect). These observations suggest that the effect of these  
22 inhibitors and inducers may be more relevant in AA patient as they tend to carry the wild type CYP3A5 and may  
23 result in therapeutic resistance. This study also suggests care be taken while prescribing CYP3A5 inducers when  
24 the patients are undergoing ADT. In addition, it also suggests that genetic testing for CYP3A5 polymorphism in  
25 patients may provide significant information about the potential impact of these interactions, facilitating  
26 personalized treatment regimens.

1 **LEGENDS:**

2 **Table 1: CYP3A5 polymorphism analysis of commonly used prostate cancer cell lines.** Seven androgen  
3 responsive prostate cell lines were tested for presence of wild type (\*1) or mutant inactive (\*3) CYP3A5  
4 polymorphism by using a qPCR based genotyping assay.

5 **Table 2: CYP3A5 inhibition downregulates AR downstream regulated genes.** Table showing down  
6 regulation of AR downstream genes with CYP3A5 siRNA treatment. These indicate that CYP3A5 activity  
7 modulating medications can affect AR downstream signaling regulating growth.

8  
9 **Figure 1: CYP3A5 siRNA downregulates AR nuclear translocation and expression of AR downstream**  
10 **regulated genes: (A, C)** MDAPCa2b cells were transfected with CYP3A5 and non target (NT) siRNA. After 72  
11 hours the cells were given 10nM DHT treatment (0, 1 and 2 hours). For microscopy **(A)** the cells were labelled  
12 with AR primary antibody and Cy5 secondary. The scale bar represents 50  $\mu$ m. **(B)** Total protein was used to  
13 monitor changes in total AR protein expression. **(C)** After cell fractionation, the western blotting was performed  
14 using cytoplasmic and nuclear fractions and probed for AR, Tubulin and Lamin. **(D)** MDAPCa2b cells were  
15 seeded into 6 well plates. After 48 hours of allowing them to settle, the cells were treated with CYP3A5 siRNA  
16 or Non-Target siRNA and incubated for another 72 hours. RNA was isolated followed by cDNA preparation which  
17 was used in RT<sup>2</sup> profiler assay. Fold-change values greater than 1 are indicated as positive- or an up-regulation  
18 (red) and less than -1 are indicated as negative or down-regulation (green). The P values are calculated based  
19 on a Student's t-test of the replicate 2<sup>^</sup> (- Delta CT) values for each gene in the control group and treatment  
20 groups. **(E1, E2)** Protein expression of the 7 genes that changes in gene expression was evaluated using western  
21 blotting. FKBP5, cMYC, ELK, Prostein (SLC45A3) showed decreased protein expression in response to CYP3A5  
22 knock down. Whereas, MME, SPDEF and KLK showed no change.

23 **Figure 2: CYP3A5 inhibitors and inducers affect nuclear translocation of AR and its downstream**  
24 **signaling. (A)** Effect of CYP inhibiting or inducing drugs on total AR expression. Total cell lysates from LNCaP  
25 and MDAPCa2b cells treated with CYP inhibitors (Ritonavir-35  $\mu$ M, Azamulin 10  $\mu$ M and Amiodarone-5  $\mu$ M) and  
26 inducers (Phenytoin-50  $\mu$ M and Rifampicin-30 $\mu$ g/ml) for 48 hours was used for western analysis. **(B)** Nuclear  
27 localization of AR after CYP3A5 inhibitor / inducer treatment. Immunostaining was performed on LNCaP and



1 MDAPCa2b cells that were treated with CYP3A inhibitors (Ritonavir-35  $\mu$ M and Amiodarone-5  $\mu$ M) and inducers  
2 (Phenytoin-50  $\mu$ M and Rifampicin-30 $\mu$ g/ml) for 48 hours in charcoal stripped serum media followed by with and  
3 without DHT induction (90min for LNCaP or 120 min for MDAPCa2b). Nucleus is stained with DAPI (blue), AR  
4 is stained with Cy5-secondary (red) antibody. Scale bar represents 25  $\mu$ m. A section from center of z-stack is  
5 shown here to demonstrate the localization of AR in nucleus after treatments. **(C1)** Cell fractionation was  
6 performed after treating LNCaP and MDAPCa2b cells with Amiodarone (5 $\mu$ M) for 72 hours. The cytoplasmic and  
7 nuclear fractions were evaluated using western. **(C2)** MDAPCa2b cells were treated with phenytoin (50  $\mu$ M)  
8 followed by 10nM DHT induction (120 min), nuclear and cytoplasmic fractions were analyzed by western blotting.  
9 Lamin and tubulin are controls for nuclear and cytoplasmic fractions. **(D)** AR nuclear translocation by CYP  
10 inducers in NT/CYP3A5 siRNA treated MDAPCa2b cells. MDAPCa2b cells were treated with NT/CYP3A5 siRNA  
11 for 24 hours and then incubated with CYP3A inducers, phenytoin (75 $\mu$ M) and rifampicin (30  $\mu$ g/mL) for 48 hours.  
12 Confocal microscopy was performed and center of Z-stack is shown for nuclear AR localization. AR-red (Cy5)  
13 and nucleus (blue). Scale bar represents 25  $\mu$ m. **(E)** To Confirm the effect of CYP3A5 modulating drugs on AR  
14 downstream signaling LNCaP and MDAPCa2b cells were treated with Phenytoin (50  $\mu$ M), Rifampicin (30  $\mu$ g/mL),  
15 Amiodarone (5  $\mu$ M) in charcoal stripped serum media followed by 24 or 48 hours of DHT treatment. Total cell  
16 lysate was used to check PSA production using western analysis.

17 **Figure 3: Effect of CYP inducers and inhibitors on cell growth in LNCaP and MDAPCa2b cells. (A-B)**  
18 MDAPCa2b and LNCaP cells transfected with androgen response elements (ARE) fused to luciferase were used  
19 to evaluate AR downstream signaling activity. MDAPCa2b cells were treated with known CYP3A5 inducers  
20 (Phenytoin-50  $\mu$ M, hyperforin- 200 $\mu$ g/ml and Rifampicin-30 $\mu$ g/ml) and inhibitors (Ritonavir-35  $\mu$ M, Azamulin-10  
21  $\mu$ M, chloramphenicol- 10 $\mu$ M and Amiodarone-5  $\mu$ M). LNCaP cells were treated with CYP inducing and inhibiting  
22 drugs in charcoal stripped serum followed by DHT (10nM) induction for one hour. In both cases CYP inducers  
23 showed increased AR signaling activity where as CYP inhibitors showed decreased AR signaling activity. **(C)**  
24 LNCaP and MDAPCa2b cells were treated with a CYP inhibitors, Amiodarone (0-6  $\mu$ M) and Ritonavir (0-40  $\mu$ M),  
25 CYP inducers Phenytoin (0-60  $\mu$ M) and Rifampicin (0-35  $\mu$ M) for 96 hours. The cell growth was accessed using  
26 MTS assay.

1 **References:**

- 2 1. Huggins C, Hodges CV: Studies on prostatic cancer. I. The effect of castration, of estrogen and of  
3 androgen injection on serum phosphatases in metastatic carcinoma of the prostate. 1941. *J Urol* 2002,  
4 167(2 Pt 2):948-951; discussion 952.
- 5 2. Sadi MV, Walsh PC, Barrack ER: Immunohistochemical study of androgen receptors in metastatic  
6 prostate cancer. Comparison of receptor content and response to hormonal therapy. *Cancer* 1991,  
7 67(12):3057-3064.
- 8 3. van der Kwast TH, Schalken J, Ruizeveld de Winter JA, van Vroonhoven CC, Mulder E, Boersma W,  
9 Trapman J: Androgen receptors in endocrine-therapy-resistant human prostate cancer. *Int J Cancer*  
10 1991, 48(2):189-193.
- 11 4. Chodak GW, Kranc DM, Puy LA, Takeda H, Johnson K, Chang C: Nuclear localization of androgen  
12 receptor in heterogeneous samples of normal, hyperplastic and neoplastic human prostate. *J Urol* 1992,  
13 147(3 Pt 2):798-803.
- 14 5. Heinlein CA, George Whipple Laboratory for Cancer Research DoP, Urology, and Radiation Oncology,  
15 and the Cancer Center, University of Rochester, Rochester, New York 14642, Chang C, George Whipple  
16 Laboratory for Cancer Research DoP, Urology, and Radiation Oncology, and the Cancer Center,  
17 University of Rochester, Rochester, New York 14642: Androgen Receptor in Prostate Cancer. *Endocrine*  
18 *Reviews* 2004, 25(2):276-308.
- 19 6. de Bono JS, Logothetis CJ, Molina A, Fizazi K, North S, Chu L, Chi KN, Jones RJ, Goodman OB, Jr.,  
20 Saad F *et al*: Abiraterone and increased survival in metastatic prostate cancer. *N Engl J Med* 2011,  
21 364(21):1995-2005.
- 22 7. Bianchini D, Lorente D, Rodriguez-Vida A, Omlin A, Pezaro C, Ferraldeschi R, Zivi A, Attard G,  
23 Chowdhury S, de Bono JS: Antitumour activity of enzalutamide (MDV3100) in patients with metastatic  
24 castration-resistant prostate cancer (CRPC) pre-treated with docetaxel and abiraterone. *Eur J Cancer*  
25 2014, 50(1):78-84.

- 1 8. Darshan MS, Loftus MS, Thadani-Mulero M, Levy BP, Escuin D, Zhou XK, Gjyrezi A, Chanel-Vos C,  
2 Shen R, Tagawa ST *et al*: Taxane-induced blockade to nuclear accumulation of the androgen receptor  
3 predicts clinical responses in metastatic prostate cancer. *Cancer Res* 2011, 71(18):6019-6029.
- 4 9. Mezynski J, Pezaro C, Bianchini D, Zivi A, Sandhu S, Thompson E, Hunt J, Sheridan E, Baikady B,  
5 Sarvadikar A *et al*: Antitumour activity of docetaxel following treatment with the CYP17A1 inhibitor  
6 abiraterone: clinical evidence for cross-resistance? *Ann Oncol* 2012, 23(11):2943-2947.
- 7 10. Mitra R, Goodman OB: CYP3A5 regulates prostate cancer cell growth by facilitating nuclear translocation  
8 of AR. *Prostate* 2015, 75:527-538.
- 9 11. Zanger UM, Schwab M: Cytochrome P450 enzymes in drug metabolism: regulation of gene expression,  
10 enzyme activities, and impact of genetic variation. *Pharmacol Ther* 2013, 138(1):103-141.
- 11 12. Yamakoshi Y, Kishimoto T, Sugimura K, Kawashima H: Human prostate CYP3A5: identification of a  
12 unique 5'-untranslated sequence and characterization of purified recombinant protein. *Biochem Biophys*  
13 *Res Commun* 1999, 260(3):676-681.
- 14 13. Hou G, Zheng Y, Wei D, Li X, Wang F, Tian J, Zhang G, Yan F, Zhu Z, Meng P *et al*: Development and  
15 validation of a SEER-based prognostic nomogram for patients with bone metastatic prostate cancer.  
16 *Medicine (Baltimore)* 2019, 98(39):e17197.
- 17 14. Tompkins LM, Wallace AD: Mechanisms of cytochrome P450 induction. *J Biochem Mol Toxicol* 2007,  
18 21(4):176-181.
- 19 15. Lolodi O, Wang YM, Wright WC, Chen T: Differential Regulation of CYP3A4 and CYP3A5 and its  
20 Implication in Drug Discovery. *Curr Drug Metab* 2017, 18(12):1095-1105.
- 21 16. Nem D, Baranyai D, Qiu H, Godtel-Armbrust U, Nestler S, Wojnowski L: Pregnane X receptor and yin  
22 yang 1 contribute to the differential tissue expression and induction of CYP3A5 and CYP3A4. *PLoS One*  
23 2012, 7(1):e30895.
- 24 17. Finnstrom N, Bjelfman C, Soderstrom TG, Smith G, Egevad L, Norlen BJ, Wolf CR, Rane A: Detection  
25 of cytochrome P450 mRNA transcripts in prostate samples by RT-PCR. *Eur J Clin Invest* 2001,  
26 31(10):880-886.

- 1 18. Leskela S, Honrado E, Montero-Conde C, Landa I, Cascon A, Leton R, Talavera P, Cozar JM, Concha  
2 A, Robledo M *et al*: Cytochrome P450 3A5 is highly expressed in normal prostate cells but absent in  
3 prostate cancer. *Endocr Relat Cancer* 2007, 14(3):645-654.
- 4 19. Moilanen AM, Hakkola J, Vaarala MH, Kauppila S, Hirvikoski P, Vuoristo JT, Edwards RJ, Paavonen TK:  
5 Characterization of androgen-regulated expression of CYP3A5 in human prostate. *Carcinogenesis* 2007,  
6 28(5):916-921.
- 7 20. Kuehl P, Zhang J, Lin Y, Lamba J, Assem M, Schuetz J, Watkins PB, Daly A, Wrighton SA, Hall SD *et*  
8 *al*: Sequence diversity in CYP3A promoters and characterization of the genetic basis of polymorphic  
9 CYP3A5 expression. *Nat Genet* 2001, 27(4):383-391.
- 10 21. Theodore S, Sharp S, Zhou J, Turner T, Li H, Miki J, Ji Y, Patel V, Yates C, Rhim JS: Establishment and  
11 characterization of a pair of non-malignant and malignant tumor derived cell lines from an African  
12 American prostate cancer patient. *Int J Oncol* 2010, 37(6):1477-1482.
- 13 22. Hooker SE, Woods-Burnham L, Bathina M, Lloyd SM, Gorjala P, Mitra R, Nonn L, Kimbro KS, Kittles R:  
14 Genetic ancestry analysis reveals misclassification of commonly used cancer cell lines. *Cancer Epidemiol*  
15 *Biomarkers Prev* 2019.
- 16 23. Lynch T, Price A: The effect of cytochrome P450 metabolism on drug response, interactions, and adverse  
17 effects. *Am Fam Physician* 2007, 76(3):391-396.
- 18 24. Schuetz EG, Relling MV, Kishi S, Yang W, Das S, Chen P, Cook EH, Rosner GL, Pui CH, Blanco JG *et*  
19 *al*: PharmGKB update: II. CYP3A5, cytochrome P450, family 3, subfamily A, polypeptide 5. *Pharmacol*  
20 *Rev* 2004, 56(2):159.
- 21 25. Lamba JK, Lin YS, Schuetz EG, Thummel KE: Genetic contribution to variable human CYP3A-mediated  
22 metabolism. *Adv Drug Deliv Rev* 2002, 54(10):1271-1294.
- 23 26. Lamba J, Hebert JM, Schuetz EG, Klein TE, Altman RB: PharmGKB summary: very important  
24 pharmacogene information for CYP3A5. *Pharmacogenet Genomics* 2012, 22(7):555-558.
- 25 27. Xu J, Kalos M, Stolk JA, Zasloff EJ, Zhang X, Houghton RL, Filho AM, Nolasco M, Badaro R, Reed SG:  
26 Identification and characterization of prostein, a novel prostate-specific protein. *Cancer Res* 2001,  
27 61(4):1563-1568.

- 1 28. Kalos M, Askaa J, Hylander BL, Repasky EA, Cai F, Vedvick T, Reed SG, Wright GL, Jr., Fanger GR:  
2 Prostein expression is highly restricted to normal and malignant prostate tissues. *Prostate* 2004,  
3 60(3):246-256.
- 4 29. Avellino R, Romano S, Parasole R, Bisogni R, Lamberti A, Poggi V, Venuta S, Romano MF: Rapamycin  
5 stimulates apoptosis of childhood acute lymphoblastic leukemia cells. *Blood* 2005, 106(4):1400-1406.
- 6 30. Pei H, Li L, Fridley BL, Jenkins GD, Kalari KR, Lingle W, Petersen G, Lou Z, Wang L: FKBP51 affects  
7 cancer cell response to chemotherapy by negatively regulating Akt. *Cancer Cell* 2009, 16(3):259-266.
- 8 31. Bolton EC, So AY, Chaivorapol C, Haqq CM, Li H, Yamamoto KR: Cell- and gene-specific regulation of  
9 primary target genes by the androgen receptor. *Genes Dev* 2007, 21(16):2005-2017.
- 10 32. Ni L, Yang CS, Gioeli D, Frierson H, Toft DO, Paschal BM: FKBP51 promotes assembly of the Hsp90  
11 chaperone complex and regulates androgen receptor signaling in prostate cancer cells. *Mol Cell Biol*  
12 2010, 30(5):1243-1253.
- 13 33. Grad JM, Dai JL, Wu S, Burnstein KL: Multiple androgen response elements and a Myc consensus site  
14 in the androgen receptor (AR) coding region are involved in androgen-mediated up-regulation of AR  
15 messenger RNA. *Mol Endocrinol* 1999, 13(11):1896-1911.
- 16 34. Koh CM, Bieberich CJ, Dang CV, Nelson WG, Yegnasubramanian S, De Marzo AM: MYC and Prostate  
17 Cancer. *Genes Cancer* 2010, 1(6):617-628.
- 18 35. Tomlins SA, Mehra R, Rhodes DR, Cao X, Wang L, Dhanasekaran SM, Kalyana-Sundaram S, Wei JT,  
19 Rubin MA, Pienta KJ *et al*: Integrative molecular concept modeling of prostate cancer progression. *Nat*  
20 *Genet* 2007, 39(1):41-51.
- 21 36. Bai S, Cao S, Jin L, Kobelski M, Schouest B, Wang X, Ungerleider N, Baddoo M, Zhang W, Corey E *et*  
22 *al*: A positive role of c-Myc in regulating androgen receptor and its splice variants in prostate cancer.  
23 *Oncogene* 2019.
- 24 37. Gao L, Schwartzman J, Gibbs A, Lisac R, Kleinschmidt R, Wilmot B, Bottomly D, Coleman I, Nelson P,  
25 McWeeney S *et al*: Androgen receptor promotes ligand-independent prostate cancer progression through  
26 c-Myc upregulation. *PLoS One* 2013, 8(5):e63563.

- 1 38. Qiu X, Pascal LE, Song Q, Zang Y, Ai J, O'Malley KJ, Nelson JB, Wang Z: Physical and Functional  
2 Interactions between ELL2 and RB in the Suppression of Prostate Cancer Cell Proliferation, Migration,  
3 and Invasion. *Neoplasia* 2017, 19(3):207-215.
- 4 39. Sims RJ, 3rd, Belotserkovskaya R, Reinberg D: Elongation by RNA polymerase II: the short and long of  
5 it. *Genes Dev* 2004, 18(20):2437-2468.
- 6 40. Hieronymus H, Lamb J, Ross KN, Peng XP, Clement C, Rodina A, Nieto M, Du J, Stegmaier K, Raj SM  
7 *et al*: Gene expression signature-based chemical genomic prediction identifies a novel class of HSP90  
8 pathway modulators. *Cancer Cell* 2006, 10(4):321-330.
- 9 41. Pascal LE, Masoodi KZ, Liu J, Qiu X, Song Q, Wang Y, Zang Y, Yang T, Wang Y, Rigatti LH *et al*:  
10 Conditional deletion of ELL2 induces murine prostate intraepithelial neoplasia. *J Endocrinol* 2017,  
11 235(2):123-136.
- 12 42. Zhang W, Liu B, Wu W, Li L, Broom BM, Basourakos SP, Korentzelos D, Luan Y, Wang J, Yang G *et al*:  
13 Targeting the MYCN-PARP-DNA Damage Response Pathway in Neuroendocrine Prostate Cancer. *Clin*  
14 *Cancer Res* 2018, 24(3):696-707.
- 15 43. Kumar A, Mikolajczyk SD, Goel AS, Millar LS, Saedi MS: Expression of pro form of prostate-specific  
16 antigen by mammalian cells and its conversion to mature, active form by human kallikrein 2. *Cancer Res*  
17 1997, 57(15):3111-3114.
- 18 44. Haese A, Graefen M, Becker C, Noldus J, Katz J, Cagiannos I, Kattan M, Scardino PT, Huland E, Huland  
19 H *et al*: The role of human glandular kallikrein 2 for prediction of pathologically organ confined prostate  
20 cancer. *Prostate* 2003, 54(3):181-186.
- 21 45. Stephan C, Jung K, Nakamura T, Yousef GM, Kristiansen G, Diamandis EP: Serum human glandular  
22 kallikrein 2 (hK2) for distinguishing stage and grade of prostate cancer. *Int J Urol* 2006, 13(3):238-243.
- 23 46. Steuber T, Vickers AJ, Serio AM, Vaisanen V, Haese A, Pettersson K, Eastham JA, Scardino PT, Huland  
24 H, Lilja H: Comparison of free and total forms of serum human kallikrein 2 and prostate-specific antigen  
25 for prediction of locally advanced and recurrent prostate cancer. *Clin Chem* 2007, 53(2):233-240.

- 1 47. Shang Z, Niu Y, Cai Q, Chen J, Tian J, Yeh S, Lai KP, Chang C: Human kallikrein 2 (KLK2) promotes  
2 prostate cancer cell growth via function as a modulator to promote the ARA70-enhanced androgen  
3 receptor transactivation. *Tumour Biol* 2014, 35(3):1881-1890.

4

5

| Cell Line       | Genotype | Origin |
|-----------------|----------|--------|
| LNCaP           | *3/*3    | NHWA   |
| 22RV1           | *3/*3    | NHWA   |
| C4-2            | *3/*3    | NHWA   |
| E006AAhT        | *3/*3    | NHWA   |
| MDAPCa2b        | *1/*3    | AA     |
| RC77 T/E Tumor  | *1/*3    | AA     |
| RC77 N/E Normal | *1/*3    | AA     |

**Table 1: CYP3A5 polymorphism analysis of commonly used prostate cancer cell lines.**

Seven androgen responsive prostate cell lines were tested for presence of wild type (\*1) or mutant (\*3) CYP3A5 polymorphism by using a qPCR based genotype assay.



| <b>AR Pathway Array</b> |                        |                |
|-------------------------|------------------------|----------------|
| <b>Gene Symbol</b>      | <b>Fold regulation</b> | <b>P value</b> |
| <b>SLC45A3</b>          | -4.56                  | 0.002          |
| <b>FKBP5</b>            | -4.43                  | 0.002          |
| <b>MYC</b>              | -3.68                  | 0.001          |
| <b>MME</b>              | -3.34                  | 0.016          |
| <b>PAK1IP1</b>          | -3.25                  | 0.016          |
| <b>ELL2</b>             | -3.25                  | 0.004          |
| <b>KLK2</b>             | -2.82                  | 0.009          |
| <b>HPRT1</b>            | -2.65                  | 0.005          |
| <b>SPDEF</b>            | -2.58                  | 0.012          |
| <b>MT2A</b>             | -2.45                  | 0.001          |
| <b>SNAI2</b>            | 3.32                   | 0.005          |

**Table 2: CYP3A5 inhibition downregulates AR downstream regulated genes.** Table showing downregulation of AR downstream genes with CYP3A5 siRNA treatment in MDAPCa2b cells. The fold change is in comparison with NT (non-target) pool siRNA treatment.

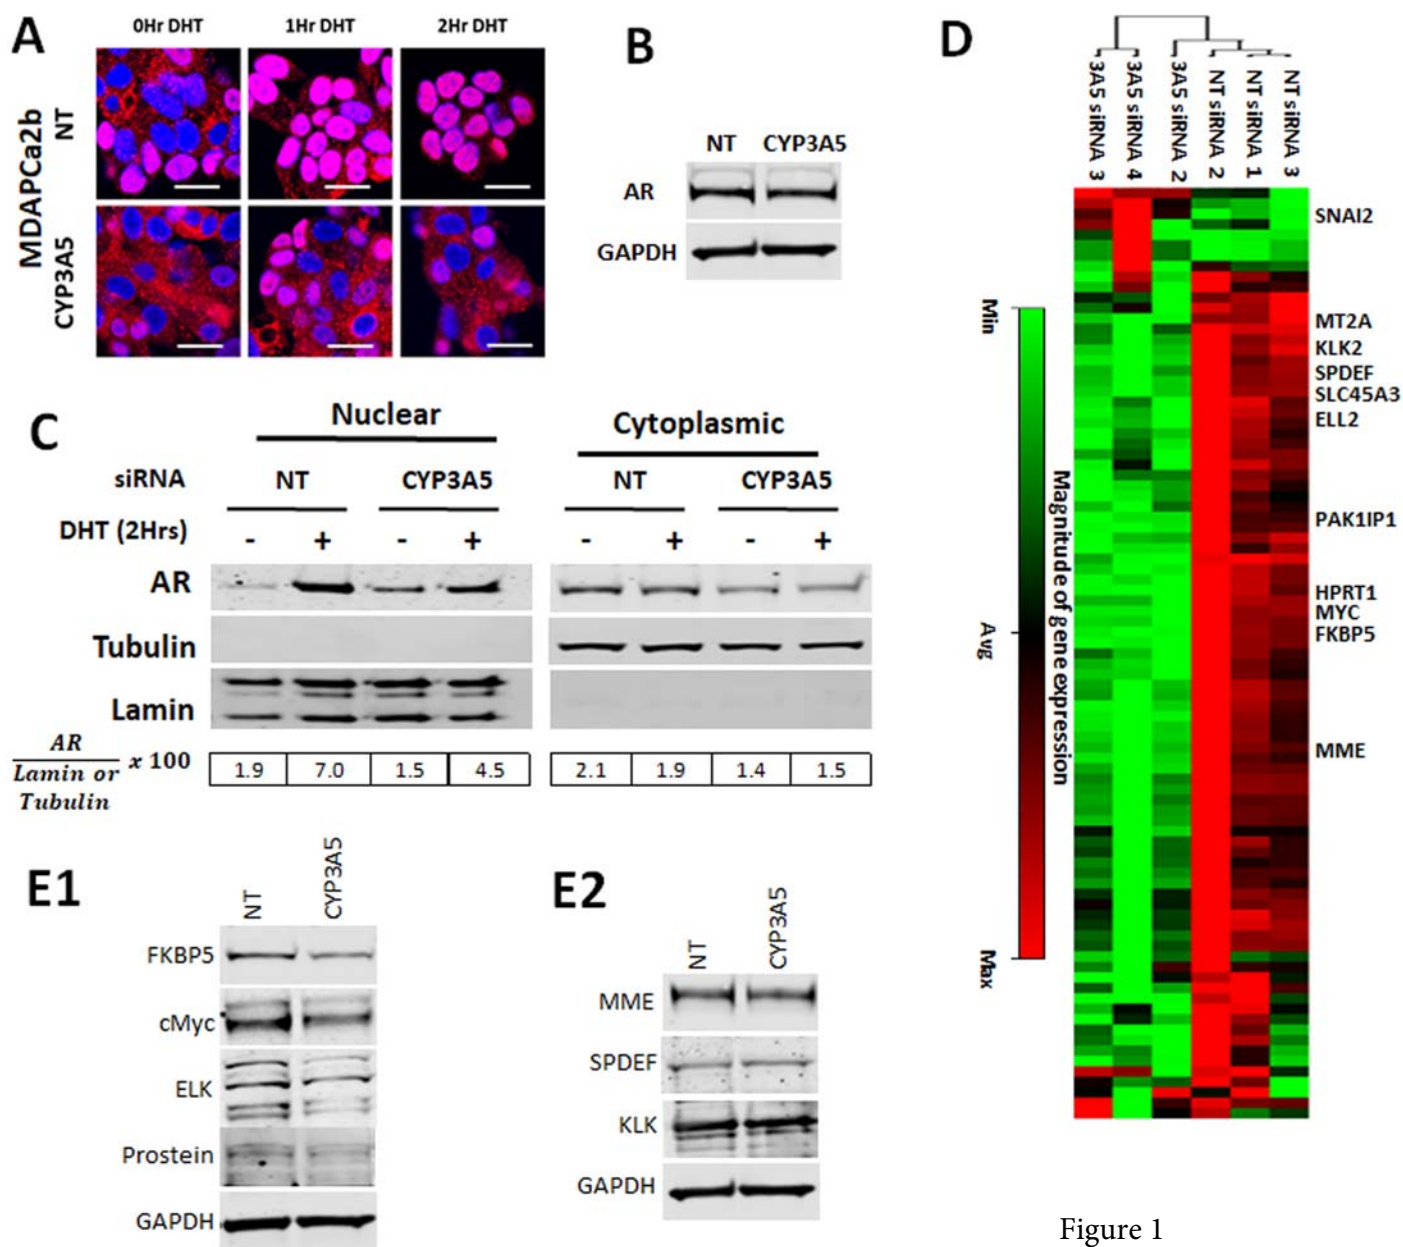

Figure 1

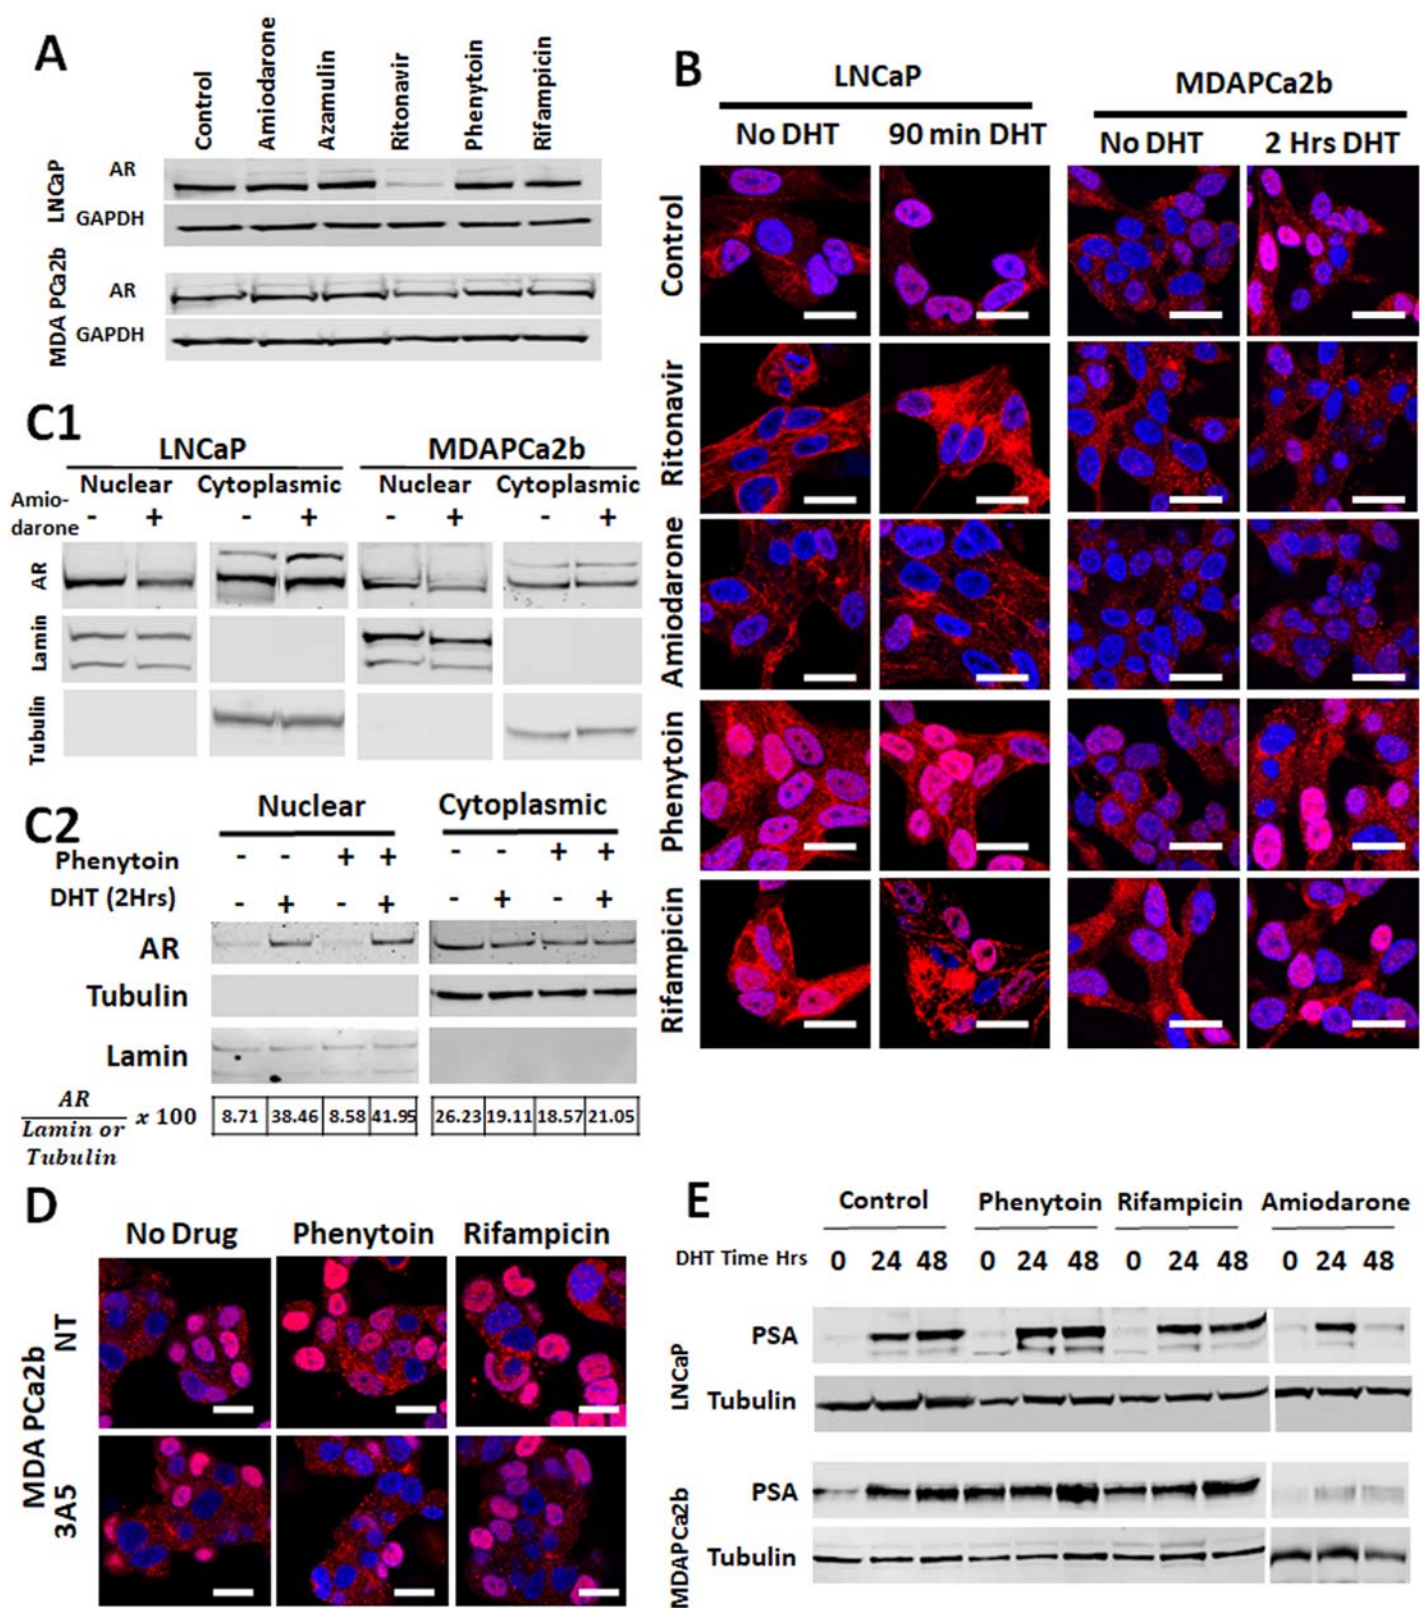

Figure 2

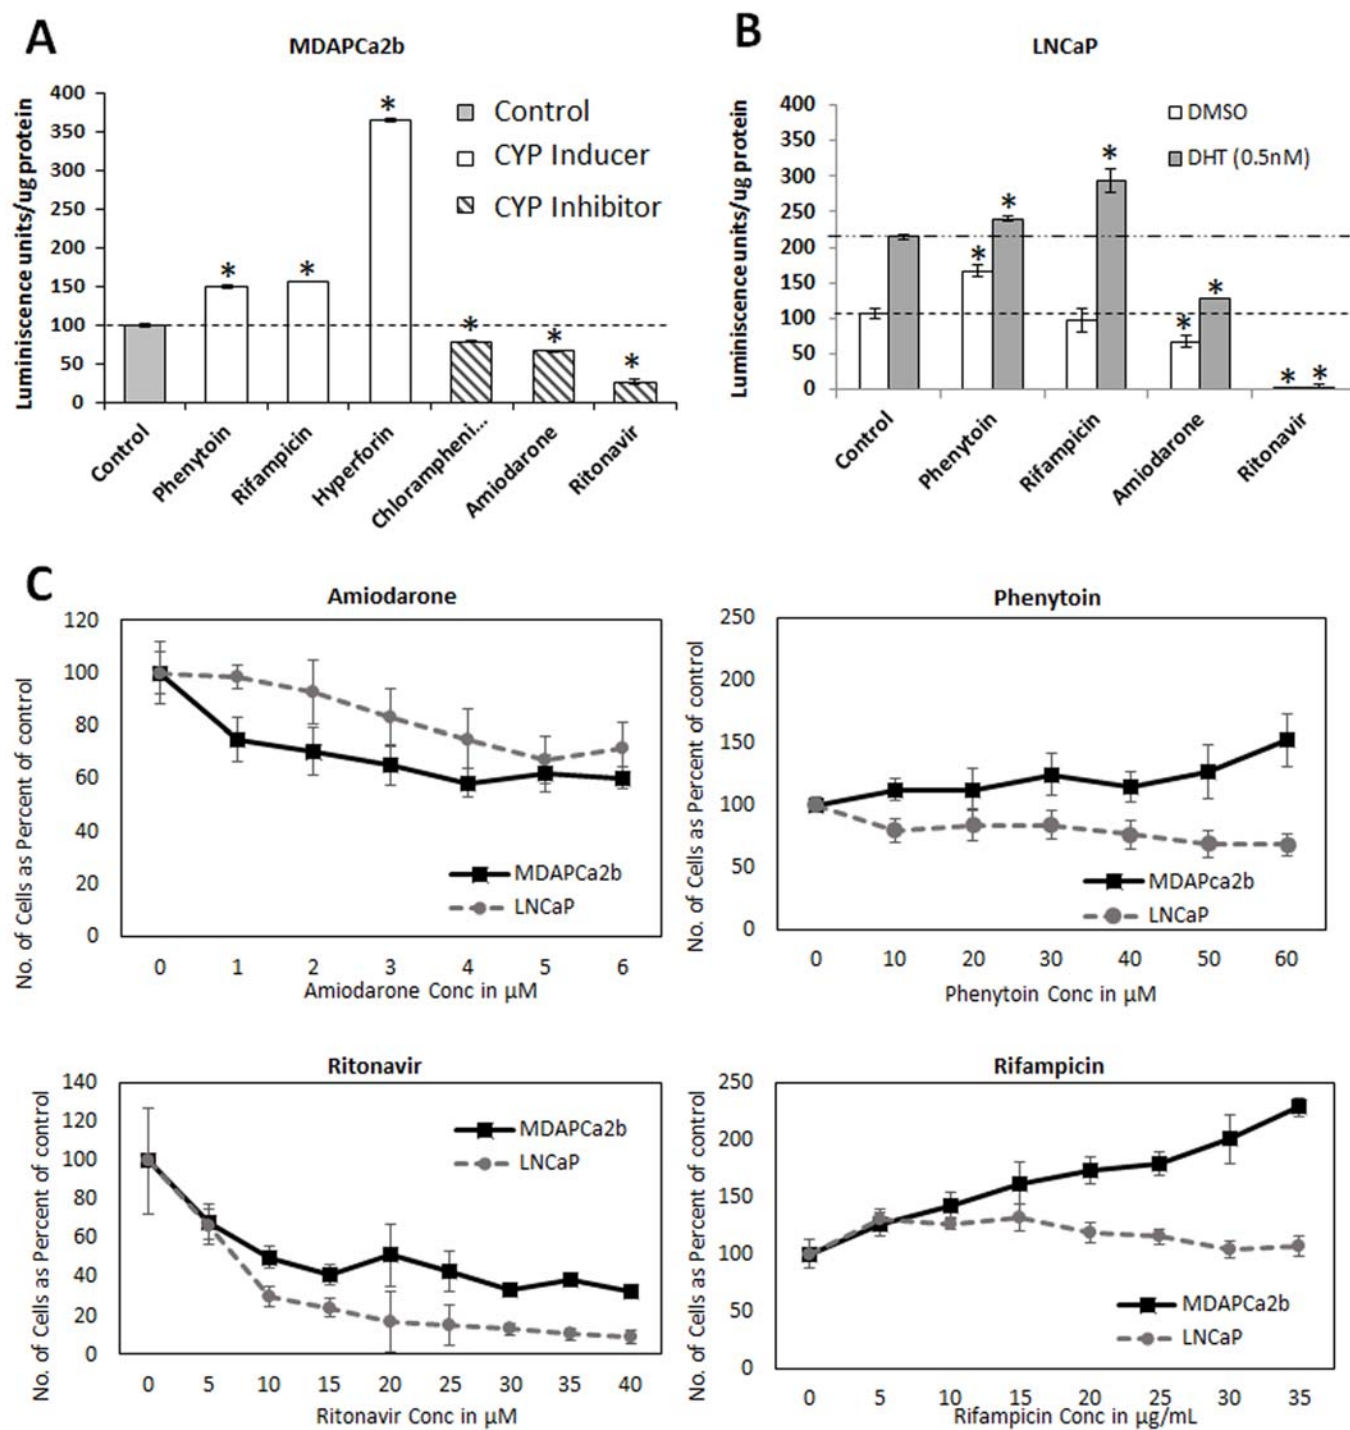

Figure 3

**Supplementary Table 1:** Table showing fold change with P value in AR downstream-regulated genes.

| Gene symbol | Fold change | P value  | Gene symbol | Fold change | P value  |
|-------------|-------------|----------|-------------|-------------|----------|
| ABCC4       | -1.4779     | 0.158456 | ORM1        | 1.839       | 0.007383 |
| ABHD2       | -1.1285     | 0.828411 | ORM2        | 2.0262      | 0.318749 |
| ACSL3       | -1.7475     | 0.031188 | PAK1IP1     | -3.254      | 0.015956 |
| ADAMTS1     | -1.468      | 0.067877 | PGC         | -1.3696     | 0.428019 |
| ALDH1A3     | -1.1699     | 0.657286 | PIAS1       | -1.3618     | 0.391551 |
| APPBP2      | -1.5388     | 0.153091 | PIK3R3      | -2.6605     | 0.017855 |
| AR          | -1.6888     | 0.06232  | PMEPA1      | -2.1143     | 0.030902 |
| CAMKK2      | -1.759      | 0.053974 | PPAP2A      | -1.3249     | 0.199678 |
| CENPN       | -2.1036     | 0.021776 | RAB4A       | -1.3636     | 0.387594 |
| CITED2      | -1.9274     | 0.041855 | REL         | -1.211      | 0.600392 |
| ACKR3       | 2.6822      | 0.062786 | RELA        | -1.3016     | 0.431876 |
| CYP2U1      | -1.6126     | 0.122682 | RHOA        | -2.1077     | 0.042831 |
| DBI         | -1.2703     | 0.025292 | SEC22C      | -1.648      | 0.048733 |
| DHCR24      | -2.1823     | 0.036002 | SGK1        | 1.373       | 0.322701 |
| EAF2        | 1.1818      | 0.144587 | SLC26A2     | -1.5196     | 0.131967 |
| ELK1        | -2.9308     | 0.037614 | SLC45A3     | -4.5619     | 0.002423 |
| ELL2        | -3.251      | 0.003617 | SMS         | -1.3771     | 0.30469  |
| ENDOD1      | -1.3374     | 0.403678 | SNAI2       | 3.32        | 0.00497  |
| ERRFI1      | -1.5812     | 0.377001 | SORD        | -1.5679     | 0.014492 |
| FAM105A     | -1.0251     | 0.941778 | SP1         | -1.9549     | 0.070468 |
| FKBP5       | -4.4312     | 0.001668 | SPDEF       | -2.5759     | 0.012049 |
| FOS         | -1.1142     | 0.897169 | SRF         | -3.0659     | 0.019875 |
| FZD5        | -2.9479     | 0.057798 | STEAP4      | -1.4217     | 0.663406 |
| GUCY1A3     | -3.037      | 0.069962 | STK39       | 1.0655      | 0.700221 |
| HERC3       | -2.6578     | 0.020277 | TIPARP      | -1.427      | 0.342979 |
| HPGD        | -2.0116     | 0.045285 | TMPRSS2     | -2.0577     | 0.043524 |
| IGF1R       | -2.0479     | 0.049184 | TPD52       | -2.6335     | 0.026346 |
| IGFBP5      | 1.0841      | 0.101161 | TRIB1       | -1.4319     | 0.444507 |
| IRS2        | -1.6835     | 0.118206 | TSC22D1     | -2.216      | 0.044714 |
| JUN         | -1.0436     | 0.926472 | TSC22D3     | -1.7487     | 0.114683 |
| KLK2        | -2.8097     | 0.009208 | VAPA        | -1.6904     | 0.169269 |
| KLK3        | -1.9642     | 0.129541 | VIPR1       | -1.6018     | 0.025484 |
| KLK4        | 1.1909      | 0.407188 | WIPI1       | 1.3647      | 0.273765 |
| KRT8        | -1.1503     | 0.779502 | ZBTB10      | -1.1935     | 0.584875 |
| LIFR        | -1.5469     | 0.168466 | ZBTB16      | -1.5105     | 0.108269 |
| LRIG1       | -1.5578     | 0.106212 | ZNF189      | -2.0552     | 0.071295 |
| LRRFIP2     | -2.0359     | 0.052622 | ACTB        | -1.5088     | 0.291685 |
| MAF         | -1.1133     | 0.561656 | B2M         | 1.0743      | 0.649051 |
| MAP7D1      | -1.1021     | 0.837968 | GAPDH       | -2.4307     | 0.023495 |
| MME         | -3.3395     | 0.016146 | HPRT1       | -2.651      | 0.005073 |
| MT2A        | -2.4456     | 0.000789 | RPLP0       | 1           | 0        |
| MYC         | -3.6785     | 0.000886 | HGDC        | 1.0841      | 0.101161 |
| NCAPD3      | -4.1731     | 0.010971 | RTC         | 1.053       | 0.649571 |
| NDRG1       | 1.1548      | 0.529154 | RTC         | 1.029       | 0.755263 |
| NFKB1       | -1.5773     | 0.163635 | RTC         | -1.0034     | 0.997412 |
| NFKB2       | -1.0936     | 0.86407  | PPC         | 1.1074      | 0.150436 |
| NFKBIA      | -1.2895     | 0.500925 | PPC         | 1.0029      | 0.93002  |
| NKX3-1      | -2.6587     | 0.026431 | PPC         | 1.0354      | 0.385984 |
